# Supplementary material for: A plug-and-play microfluidic device for hydrogel fiber spinning
Source: Royal Society of Chemistry journal article supplement (doi:10.1039/d4lc00783b), 2025-01-01
Supplement: d4lc00783b4.pdf [file d4lc00783b4.pdf]

Supporting Information

**A Plug-and-Play Microfluidic Device for Hydrogel Fiber Spinning**

Kongchang Wei,<sup>1,2</sup> Wuchao Wang,<sup>1</sup> Giorgia Giovannini,<sup>1</sup> Khushdeep Sharma,<sup>1</sup> René M. Rossi,<sup>1,\*</sup> Luciano F. Boesel<sup>1,\*</sup>

<sup>1</sup> Empa, Swiss Federal Laboratories for Materials Science and Technology, Laboratory for Biomimetic Membranes and Textiles, Lerchenfeldstrasse 5, 9014 St. Gallen, Switzerland

<sup>2</sup> Empa, Swiss Federal Laboratories for Materials Science and Technology, Laboratory for Biointerfaces, Lerchenfeldstrasse 5, 9014 St. Gallen, Switzerland

Corresponding authors:

\*L. F. Boesel: luciano.boesel@empa.ch

\*R. Rossi: rene.rossi@empa.ch

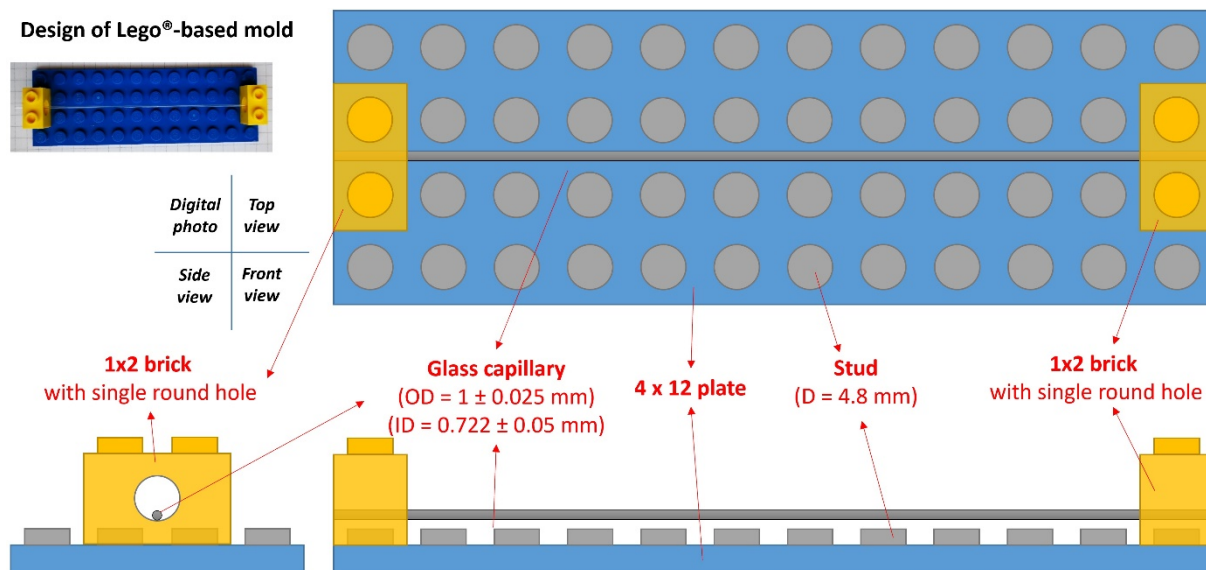

**Figure S1.** The design and assembly of the Lego®-based mold for the fabrication of PDMS microfluidic blocks.

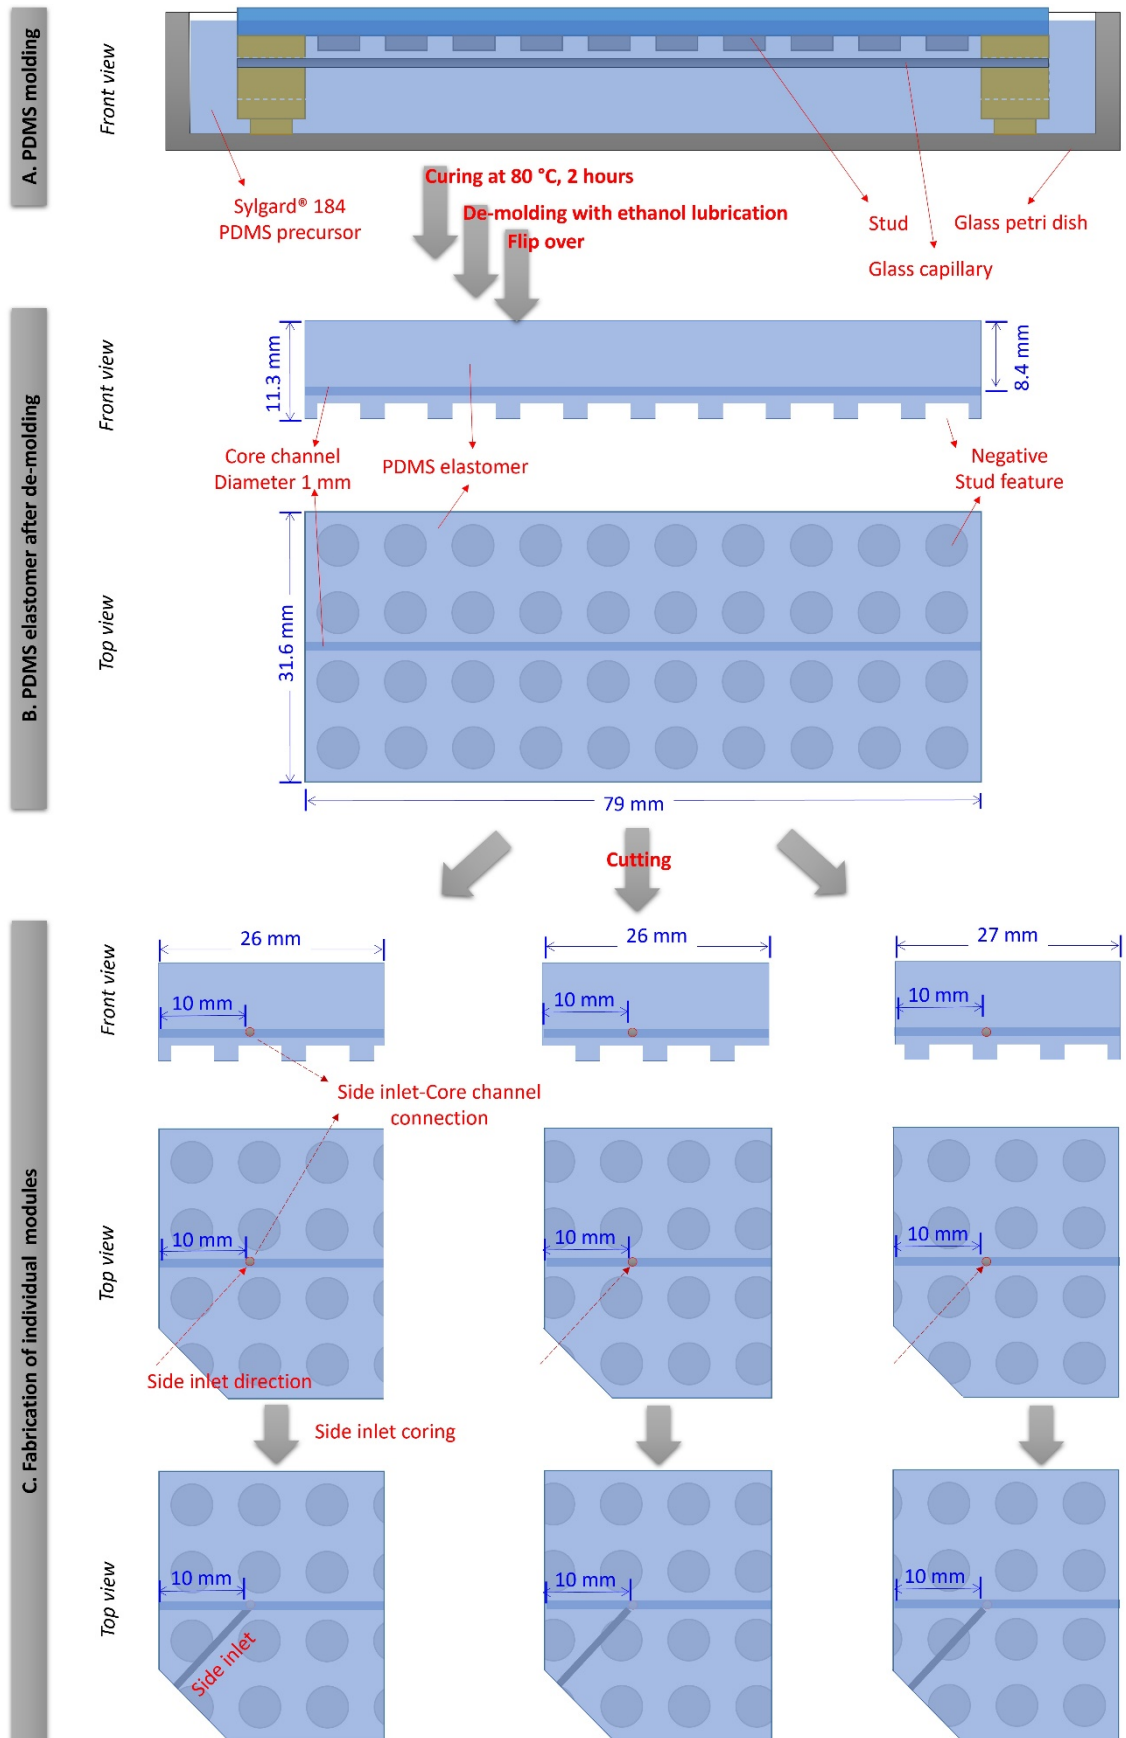

**Figure S2.** Molding (A), de-molding (B), cutting of the PDMS microfluidic block with a core channel and negative Lego® stud features, followed by the coring out of side inlets with an 18G cone needle (C).

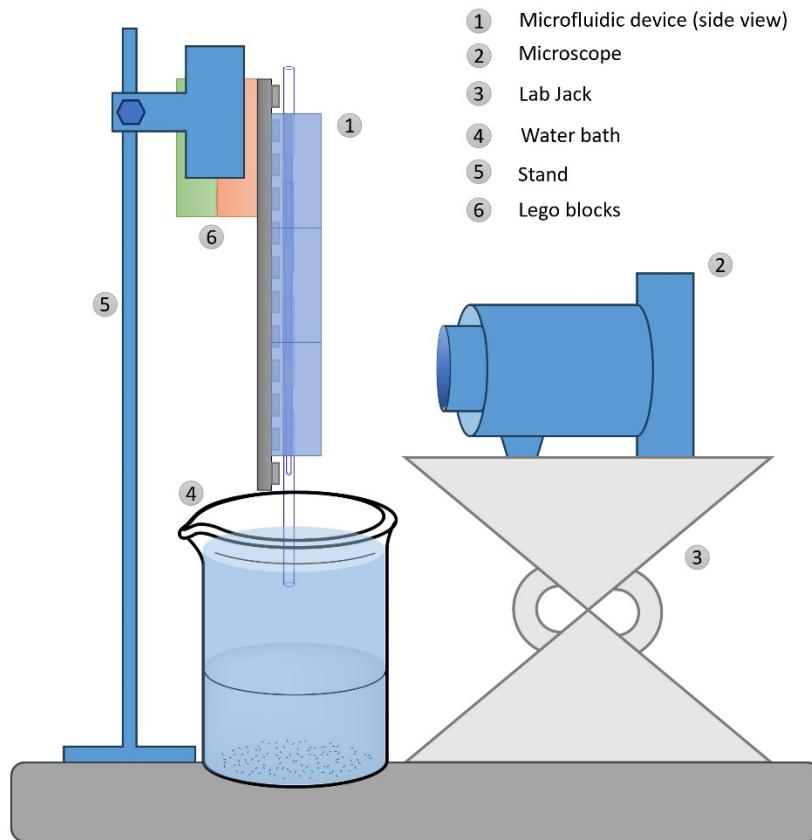

**Figure S3.** Experimental setup for microfluidic wet spinning of hydrogel fibers.

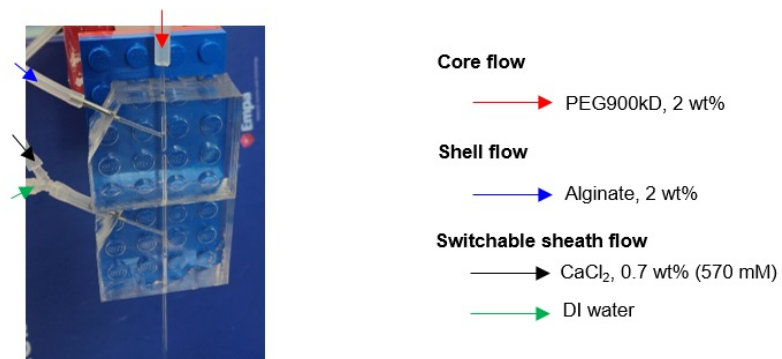

**Figure S4.** A digital photo of a dual-module device with the flow configuration used for spinning hollow alginate hydrogel fibers.

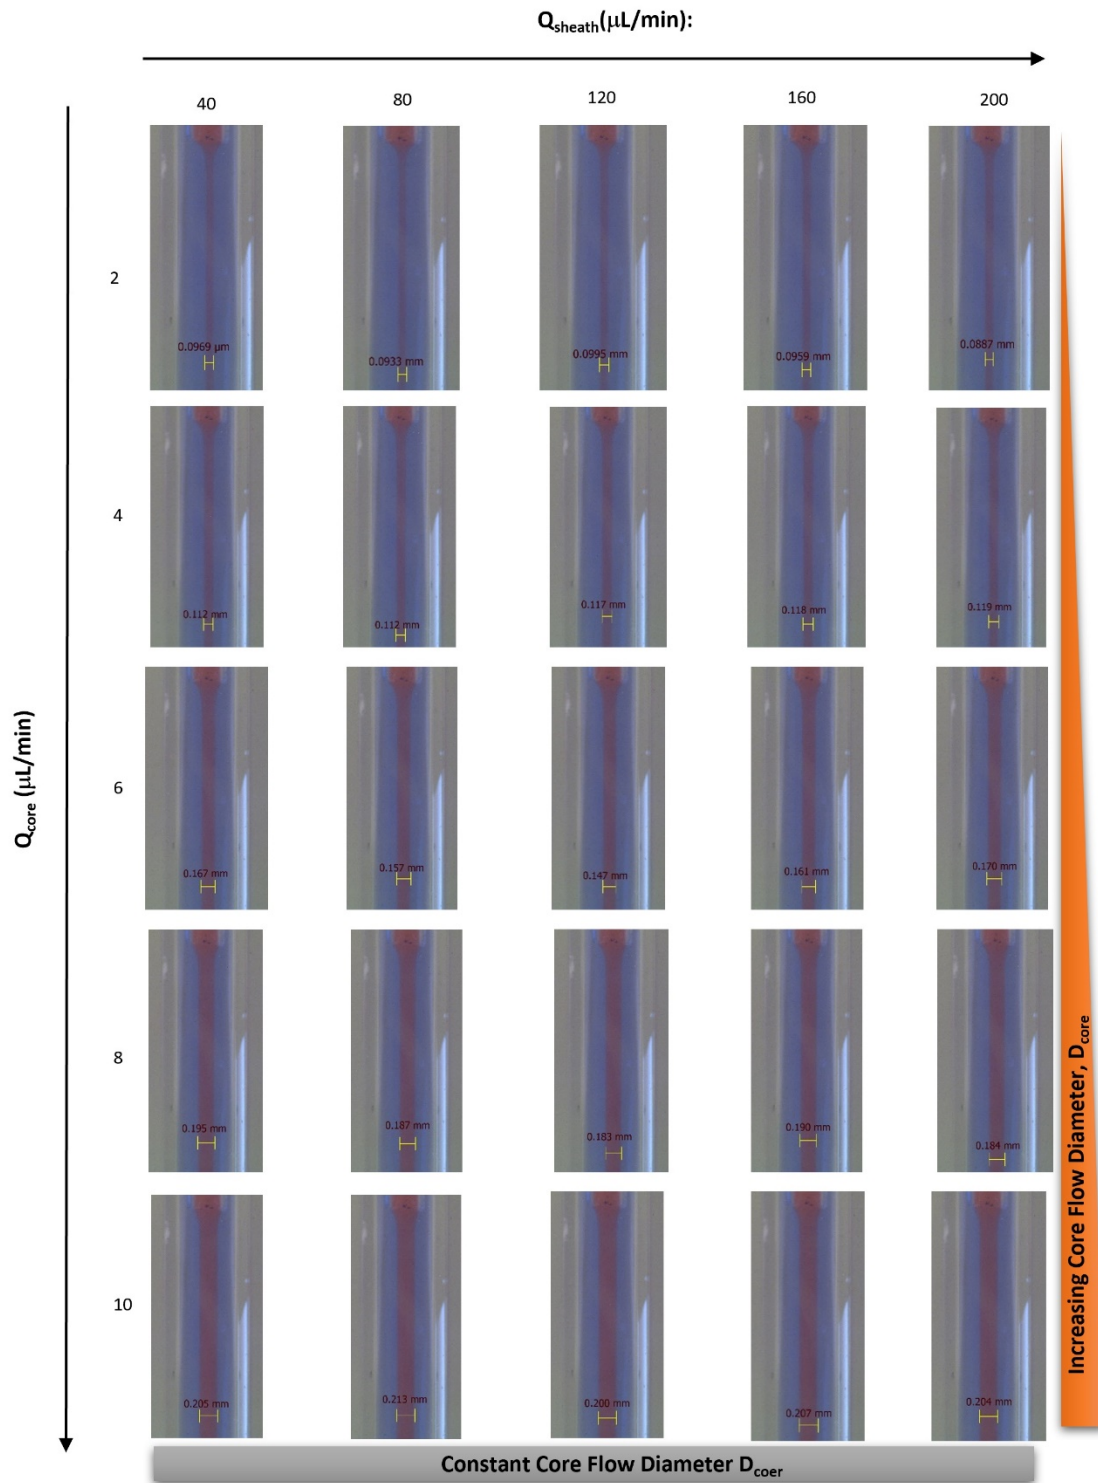

**Figure S5.** First focusing (indicated in Fig. 4A-i) core-shell flow established by the dual-module device, when  $Q_T = Q_{\text{core}} + Q_{\text{shell}}$  was fixed at  $40 \mu\text{L}/\text{min}$  under different  $Q_{\text{sheath}}$ .

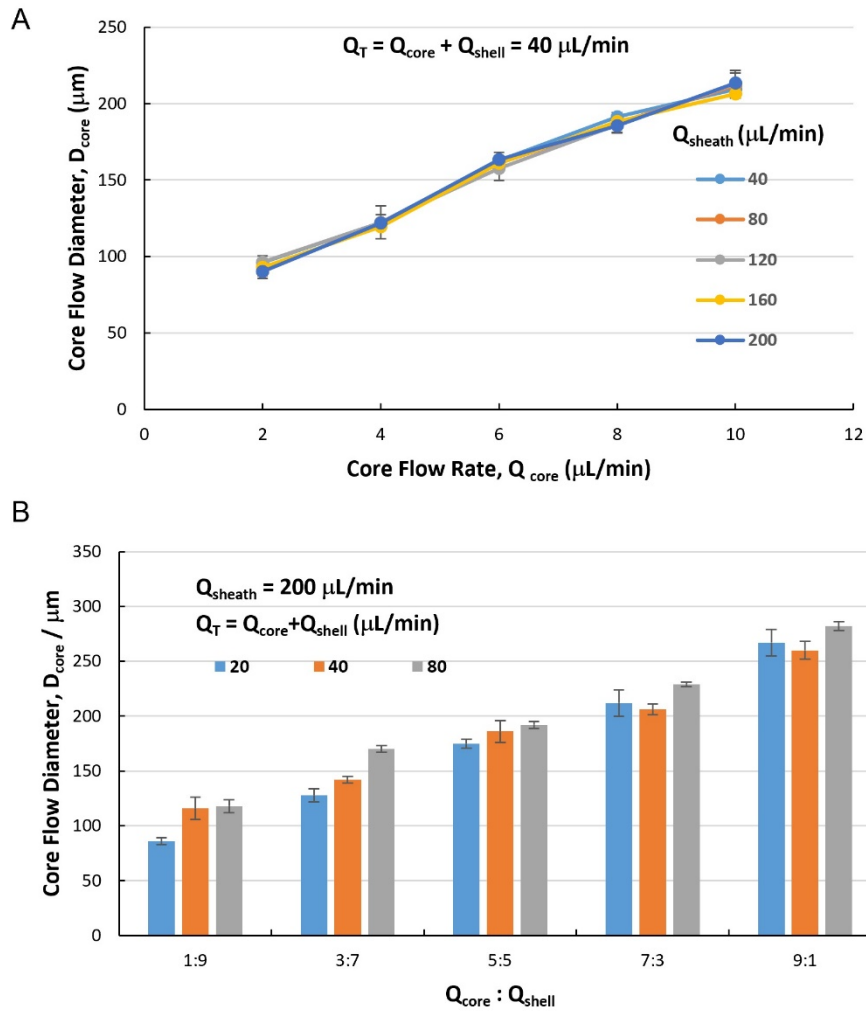

**Figure S6.** (A) Quantification of the diameter of core flows (from Figure S4, when  $Q_T = Q_{core} + Q_{shell}$  was fixed at  $40 \mu\text{L}/\text{min}$ ) under different  $Q_{sheath}$ , showing that sheath flow rate has negligible influence on core flow diameter at 1<sup>st</sup> focusing. (B) Quantification of the diameter of core flows (from Figure S3-A, when  $Q_{sheath}$  was fixed at  $200 \mu\text{L}/\text{min}$ , and  $Q_T$  varied as 20, 40 or  $80 \mu\text{L}/\text{min}$ ), showing that  $Q_T$  has negligible influence on core flow diameter at 1<sup>st</sup> focusing.

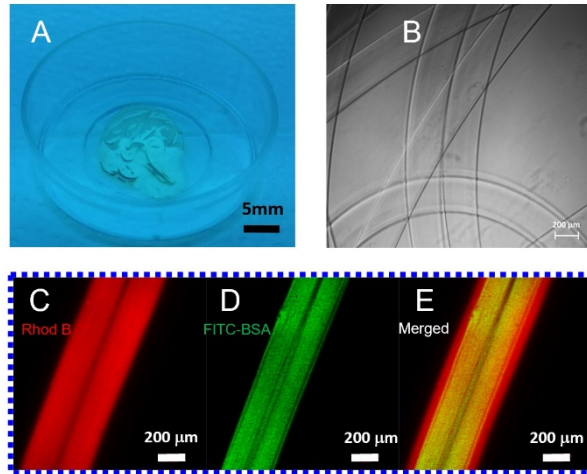

**Figure S7.** Hollow nature of the hydrogel fibers (spun with double-module device) characterized by protein (FITC-BSA) encapsulation.

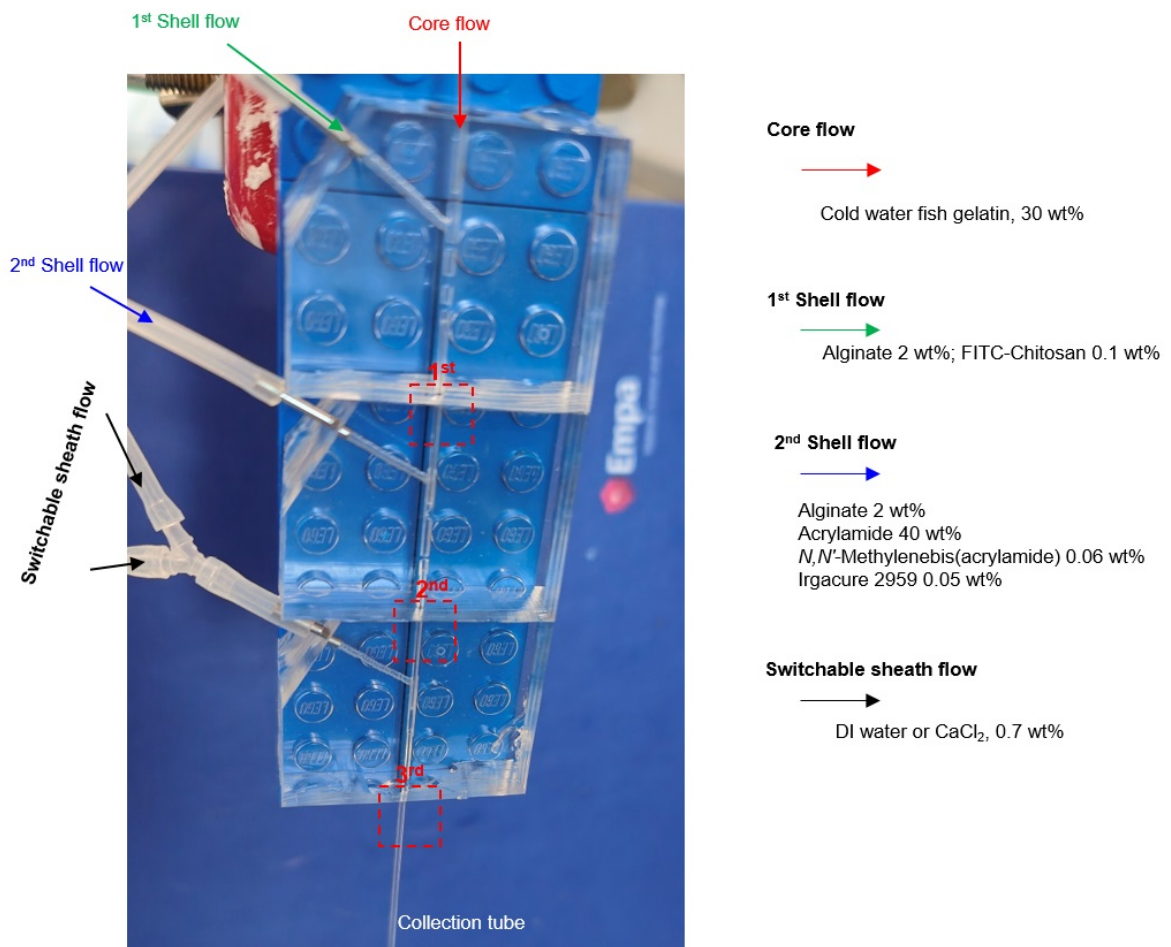

**Figure S8.** A digital photo of the tri-module device and the flow configuration for spinning pH-sensing multimaterial hydrogel fibers.

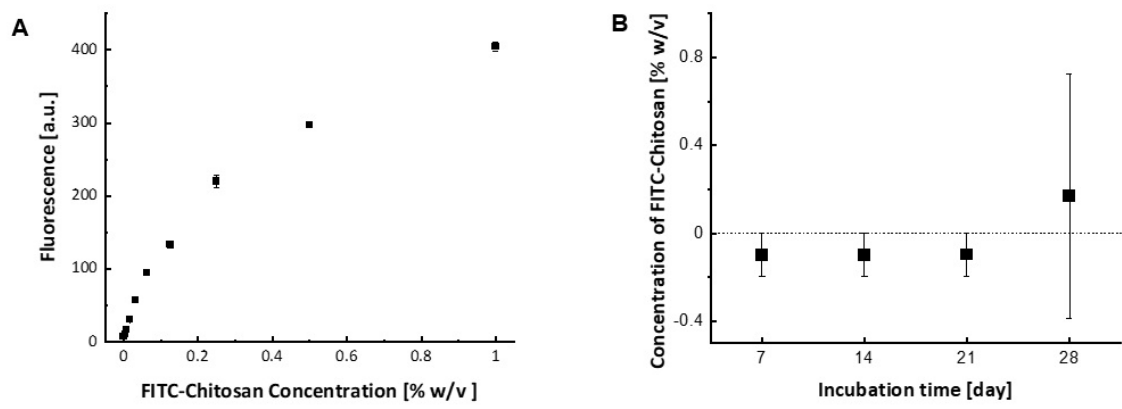

**Figure S9.** (A) Standard curve of FITC-Chitosan fluorescence according to its concentration at pH 7.5 PBS. (B) Linkage of FITC-Chitosan from fibers to at pH 7.5 in PBS.



**Table S1.** For affecting core flow diameter ( $D_{core}$ ) from single-module chip (Fig. 3A), the total fluid flow rate ( $Q_T = Q_{core} + Q_{shell}$ ) is found not statistically significant ( $P$ -value  $0.29 > 0.05$ ), while the core flow fraction  $f$  ( $f = Q_{core}/Q_T$ ) is found statistically significant ( $P$ -value  $6.63E-24 < 0.05$ ).

**ANOVA: Two-Factor With Replication**

| Source of Variation | SS       | df | MS       | F      | P-value        | F crit |
|---------------------|----------|----|----------|--------|----------------|--------|
| Sample ( $Q_T$ )    | 112.52   | 2  | 56.26    | 1.26   | <b>0.30</b>    | 3.32   |
| Columns ( $f$ )     | 55077.84 | 4  | 13769.46 | 308.65 | <b>6.6E-24</b> | 2.69   |
| Interaction         | 367.17   | 8  | 45.90    | 1.03   | <b>0.4367</b>  | 2.27   |
| Within              | 1338.34  | 30 | 44.61    |        |                |        |
| Total               | 56895.87 | 44 |          |        |                |        |

**Table S2.** For affecting core flow diameter ( $D_{core}$ ) from dual-module chip (Fig. 5B), both the core flow rate ( $Q_{core}$ ) and the sheath flow rate ( $Q_{sheath}$ ) are found statistically significant effects on core flow diameter ( $D_{core}$ ), with  $P$ -values  $< 0.05$ . A significant interaction between the effects of  $Q_{core}$  and  $Q_{sheath}$  on  $D_{core}$  is indicated by  $P$ -value of  $3.97E-17 < 0.05$ .

**ANOVA: Two-Factor With Replication**

| Source of Variation      | SS       | df | MS       | F      | P-value         | F crit |
|--------------------------|----------|----|----------|--------|-----------------|--------|
| Sample ( $Q_{core}$ )    | 120993.2 | 4  | 30248.3  | 666.07 | <b>1.10E-42</b> | 2.56   |
| Columns ( $Q_{sheath}$ ) | 70785.02 | 4  | 17696.25 | 389.67 | <b>5.18E-37</b> | 2.56   |
| Interaction              | 15829.03 | 16 | 989.31   | 21.78  | <b>3.97E-17</b> | 1.85   |
| Within                   | 2270.667 | 50 | 45.41    |        |                 |        |
| Total                    | 209877.9 | 74 |          |        |                 |        |

**Table S3.** For affecting shell flow diameter ( $D_{shell}$ ) from dual-module chip (Fig. 5C), both the core flow rate ( $Q_{core}$ ) and the sheath flow rate ( $Q_{sheath}$ ) are found statistically significant with  $P$ -values  $< 0.05$ . However, the interaction between these two factors is not significant, with a  $P$ -value of  $0.1 > 0.05$ .

**ANOVA: Two-Factor With Replication**

| Source of Variation     | SS        | df | MS     | F       | P-value         | F crit |
|-------------------------|-----------|----|--------|---------|-----------------|--------|
| Sample ( $Q_{sheath}$ ) | 574552.10 | 4  | 143638 | 2055.50 | <b>8.84E-55</b> | 2.56   |
| Columns ( $Q_{core}$ )  | 2467.73   | 4  | 616.93 | 8.83    | <b>1.80E-05</b> | 2.56   |
| Interaction             | 1810.13   | 16 | 113.13 | 1.62    | <b>0.10</b>     | 1.85   |
| Within                  | 3494      | 50 | 69.88  |         |                 |        |
| Total                   | 582324    | 74 |        |         |                 |        |

**Movie S1:** Manipulation of core-shell flow with a dual-module chip, where the core flow diameter was maintained constant, while the shell flow diameter was changed independently.

**Movie S2:** Manipulation of core-shell flow with a dual-module chip, where the shell flow diameter was maintained constant, while the core flow diameter was changed independently.

**Movie S3:** Stable 4-layer flow established with the triple-module microfluidic chip.

### **Reference**

- 1 A. M. Christensen, D. A. Chang-Yen and B. K. Gale, *J. Micromechanics Microengineering*, 2005, **15**, 928–934.
